# Supplementary material for: Correlation between Systemic Oxidative Stress and Intraocular Pressure Level
Source: PubMed Central journal article supplement (PMC4506090; doi:10.1371/journal.pone.0133582), 2015-07-17
Supplement: pone.0133582.s001.pdf [file pone.0133582.s001.pdf]

Table S1. Dataset

| Age | Sex | DISEASE | MEAL | SBP | DBP | PULSE | DM | SMOKE | dROM | BAP    | SH  | IOP  |
|-----|-----|---------|------|-----|-----|-------|----|-------|------|--------|-----|------|
| 73  | M   | GLA     | 3    | 151 | 87  | 112   | n  | n     | 490  | 1813.6 | 653 | 27   |
| 63  | F   | GLA     | 4    | 166 | 93  | 84    | y  | n     | 285  | 1850.1 | 640 | 58   |
| 85  | F   | GLA     | 5    | 122 | 65  | 68    | n  | n     | 368  | 2019.4 | 514 | 38   |
| 72  | M   | GLA     | 5    | 159 | 91  | 94    | y  | y     | 462  | 1521.8 | 577 | 20   |
| 74  | F   | GLA     | 6    | 134 | 51  | 90    | n  | n     | 441  | 1547.0 | 669 | 39   |
| 76  | M   | GLA     | 6    | 119 | 68  | 75    | y  | n     | 311  | 1708.5 | 743 | 35   |
| 52  | M   | GLA     | 2.5  | 151 | 106 | 110   | n  | y     | 448  | 990.1  | 593 | 22   |
| 77  | M   | GLA     | 3    | 157 | 100 | 94    | n  | n     | 336  | 1892.8 | 637 | 47   |
| 67  | F   | GLA     | 2    | 128 | 79  | 58    | n  | n     | 431  | 1737.0 | 582 | 17   |
| 71  | F   | GLA     | 2.5  | 136 | 74  | 83    | n  | n     | 302  | 2060.9 | 652 | 32   |
| 74  | M   | GLA     | 2    | 174 | 94  | 75    | n  | n     | 261  | 1798.6 | 626 | 18   |
| 79  | F   | GLA     | 2    | 141 | 65  | 81    | y  | n     | 304  | 2007.5 | 601 | 24   |
| 77  | F   | CT      | 4    | 126 | 68  | 72    | n  | n     | 396  | 2050.6 | 568 | 19   |
| 76  | M   | GLA     | 4    | 190 | 102 | 89    | n  | y     | 470  | 1628.0 | 546 | 39   |
| 65  | M   | GLA     | 4.5  | 211 | 133 | 92    | n  | n     | 309  | 1820.5 | 553 | 42   |
| 85  | F   | GLA     | 3.5  | 138 | 84  | 110   | n  | n     | 221  | 1516.6 | 588 | 40   |
| 68  | M   | CT      | 5    | 159 | 100 | 83    | n  | y     | 301  | 2072.7 | 639 | 20   |
| 50  | F   | GLA     | 2.5  | 140 | 87  | 73    | n  | n     | 274  | 2121.6 | 564 | 14   |
| 80  | M   | GLA     | 2.5  | 142 | 81  | 72    | n  | n     | 339  | 1994.9 | 567 | 19   |
| 73  | F   | GLA     | 2    | 172 | 93  | 94    | n  | n     | 474  | 1724.4 | 636 | 15   |
| 71  | M   | CT      | 3.5  | 120 | 57  | 67    | n  | n     | 254  | 1655.5 | 690 | 16   |
| 42  | F   | GLA     | 2    | 102 | 60  | 67    | n  | n     | 336  | 1827.8 | 630 | 23   |
| 59  | F   | CT      | 16   | 223 | 119 | 97    | n  | n     | 294  | 2058.6 | 728 | 18   |
| 61  | F   | GLA     | 3.5  | 121 | 71  | 94    | n  | n     | 281  | 1546.8 | 708 | 14   |
| 38  | F   | GLA     | 4    | 138 | 84  | 83    | n  | n     | 290  | 1904.4 | 692 | 21   |
| 79  | M   | GLA     | 3    | 164 | 86  | 86    | y  | n     | 334  | 1881.4 | 684 | 32   |
| 61  | M   | GLA     | 6.5  | 139 | 79  | 64    | y  | y     | 381  | 1928.4 | 620 | 52   |
| 87  | M   | GLA     | 2    | 164 | 81  | 81    | n  | n     | 308  | 2029.0 | 551 | 16   |
| 71  | M   | GLA     | 1    | 105 | 56  | 73    | y  | n     | 272  | 1452.8 | 681 | 34   |
| 82  | M   | GLA     | 2.5  | 167 | 96  | 100   | n  | n     | 412  | 1993.8 | 724 | 28   |
| 60  | M   | GLA     | 13   | 138 | 92  | 67    | n  | n     | 314  | 2013.3 | 807 | 22   |
| 60  | F   | GLA     | 4    | 134 | 65  | 87    | n  | n     | 310  | 1597.5 | 673 | 29   |
| 84  | F   | GLA     | 3.5  | 142 | 65  | 78    | n  | n     | 439  | 1944.0 | 640 | 52   |
| 42  | F   | GLA     | 4.5  | 109 | 71  | 84    | n  | n     | 255  | 1926.3 | 726 | 14   |
| 70  | M   | GLA     | 5    | 123 | 73  | 91    | y  | y     | 327  | 1654.5 | 551 | 21.6 |
| 68  | M   | CT      | 5.5  | 165 | 97  | 71    | n  | n     | 413  | 1801.8 | 596 | 20   |
| 78  | M   | GLA     | 5    | 146 | 71  | 109   | y  | n     | 287  | 1598.6 | 411 | 24   |
| 82  | M   | CT      | 5.5  | 143 | 81  | 82    | n  | n     | 309  | 1541.5 | 534 | 10   |
| 67  | F   | CT      | 5    | 136 | 69  | 87    | n  | n     | 344  | 1819.2 | 752 | 19   |
| 53  | F   | CT      | 6    | 159 | 84  | 74    | n  | n     | 401  | 1777.7 | 682 | 17   |
| 79  | M   | GLA     | 7.5  | 162 | 67  | 67    | n  | n     | 338  | 1354.5 | 541 | 38   |
| 76  | F   | GLA     | 6.5  | 125 | 75  | 104   | n  | n     | 379  | 1649.9 | 636 | 49   |
| 75  | M   | GLA     | 3    | 106 | 50  | 62    | n  | n     | 102  | 1572.2 | 390 | 17   |
| 70  | M   | GLA     | 4.5  | 125 | 71  | 71    | y  | n     | 296  | 1891.7 | 675 | 16   |
| 73  | M   | GLA     | 6    | 182 | 99  | 56    | n  | n     | 528  | 1262.0 | 606 | 19   |
| 86  | F   | GLA     | 5    | 133 | 74  | 84    | n  | n     | 337  | 1930.9 | 538 | 17   |
| 82  | F   | GLA     | 6    | 131 | 87  | 101   | n  | n     | 484  | 1834.5 | 475 | 56   |
| 75  | F   | GLA     | 2    | 151 | 69  | 92    | n  | n     | 372  | 2103.6 | 608 | 17   |
| 60  | F   | CT      | 3    | 139 | 88  | 79    | n  | n     | 388  | 2082.3 | 758 | 15   |
| 58  | M   | GLA     | 5    | 147 | 99  | 85    | y  | y     | 282  | 2038.1 | 777 | 37   |
| 81  | F   | GLA     | 4    | 150 | 92  | 66    | n  | n     | 336  | 2135.9 | 714 | 30   |
| 66  | M   | GLA     | 5    | 159 | 101 | 58    | n  | y     | 345  | 1806.8 | 686 | 60   |
| 79  | M   | GLA     | 3.5  | 141 | 87  | 104   | n  | n     | 436  | 1988.1 | 614 | 21   |
| 66  | F   | GLA     | 5.5  | 155 | 94  | 69    | n  | n     | 273  | 1659.0 | 724 | 55   |
| 82  | F   | GLA     | 5.5  | 127 | 74  | 80    | n  | n     | 551  | 1990.8 | 530 | 28   |
| 65  | M   | CT      | 5    | 117 | 65  | 83    | n  | n     | 302  | 1808.0 | 690 | 16   |
| 73  | M   | GLA     | 5    | 157 | 65  | 72    | y  | n     | 375  | 1866.4 | 688 | 27   |
| 44  | F   | GLA     | 4    | 105 | 63  | 64    | n  | n     | 378  | 2185.8 | 686 | 22   |
| 66  | M   | GLA     | 4    | 130 | 71  | 86    | n  | n     | 329  | 412.7  | 719 | 25   |
| 63  | M   | GLA     | 4    | 156 | 93  | 95    | n  | n     | 350  | 1861.5 | 630 | 50   |
| 62  | M   | CT      | 9    | 151 | 95  | 85    | n  | n     | 268  | 2659.5 | 577 | 17   |
| 84  | M   | GLA     | 4    | 153 | 76  | 96    | y  | n     | 423  | 2560.2 | 387 | 56   |
| 61  | F   | CT      | 6    | 146 | 97  | 73    | n  | n     | 376  | 2602.7 | 398 | 17   |
| 66  | M   | CT      | 7    | 126 | 85  | 73    | n  | n     | 352  | 2464.1 | 427 | 19   |
| 80  | M   | CT      | 6    | 153 | 76  | 78    | n  | n     | 306  | 2710.0 | 320 | 19   |
| 72  | F   | GLA     | 1.5  | 118 | 78  | 71    | n  | n     | 290  | 2339.7 | 414 | 19   |
| 77  | M   | CT      | 1    | 145 | 81  | 84    | y  | n     | 219  | 1799.9 | 389 | 19.3 |
| 72  | F   | GLA     | 3    | 121 | 71  | 68    | y  | n     | 337  | 2302.5 | 847 | 19   |
| 71  | F   | CT      | 16   | 134 | 76  | 87    | n  | n     | 332  | 2097.4 | 686 | 15.7 |
| 81  | F   | GLA     | 5    | 140 | 77  | 82    | n  | n     | 359  | 1999.7 | 608 | 47   |
| 87  | F   | GLA     | 5    | 164 | 77  | 82    | n  | n     | 344  | 2145.7 | 562 | 24   |
| 74  | F   | GLA     | 6    | 130 | 86  | 57    | n  | n     | 331  | 2074.6 | 648 | 30   |
| 56  | M   | CT      | 2    | 146 | 79  | 102   | n  | y     | 310  | 2346.1 | 737 | 16   |
| 76  | M   | GLA     | 3    | 135 | 83  | 80    | n  | n     | 289  | 1818.2 | 645 | 14   |
| 83  | F   | GLA     | 3.5  | 142 | 85  | 85    | n  | n     | 309  | 2188.9 | 572 | 20   |
| 61  | M   | GLA     | 3    | 148 | 92  | 63    | y  | n     | 378  | 1649.1 | 396 | 50   |
| 65  | M   | GLA     | 3    | 138 | 72  | 81    | n  | y     | 387  | 2024.1 | 474 | 26   |
| 60  | M   | GLA     | 5    | 140 | 73  | 91    | y  | n     | 406  | 1870.8 | 476 | 29   |
| 58  | F   | GLA     | 2    | 97  | 61  | 99    | n  | n     | 384  | 1927.1 | 396 | 21   |
| 49  | M   | GLA     | 3    | 140 | 94  | 87    | n  | n     | 278  | 1556.2 | 580 | 28   |
| 63  | F   | GLA     | 3    | 182 | 98  | 128   | n  | n     | 370  | 2028.0 | 556 | 39   |
| 78  | M   | GLA     | 3    | 126 | 81  | 73    | n  | n     | 342  | 2192.8 | 517 | 26   |
| 78  | M   | GLA     | 3    | 131 | 71  | 72    | n  | n     | 395  | 2015.6 | 558 | 28   |
| 61  | M   | GLA     | 3    | 110 | 64  | 60    | n  | y     | 358  | 2196.2 | 580 | 52   |
| 74  | F   | GLA     | 3    | 190 | 80  | 84    | y  | n     | 320  | 2000.2 | 596 | 27   |
| 64  | F   | GLA     | 5    | 137 | 91  | 102   | n  | n     | 347  | 2071.2 | 589 | 13   |
| 89  | F   | GLA     | 5    | 140 | 90  | 89    | y  | n     | 343  | 2293.7 | 486 | 42   |
| 74  | M   | GLA     | 3    | 125 | 64  | 80    | n  | n     | 318  | 1967.6 | 523 | 18   |
| 71  | M   | GLA     | 5    | 124 | 74  | 70    | n  | n     | 392  | 2183.0 | 790 | 33   |









|    |   |     |     |     |     |     |   |   |     |        |     |      |
|----|---|-----|-----|-----|-----|-----|---|---|-----|--------|-----|------|
| 56 | M | GLA | 2.5 | 133 | 90  | 86  | n | y | 420 | 1991.6 | 550 | 26   |
| 92 | M | GLA | 2.5 | 146 | 66  | 82  | n | n | 262 | 2079.2 | 547 | 15   |
| 66 | M | GLA | 4   | 126 | 72  | 88  | n | n | 308 | 2064.4 | 625 | 17   |
| 77 | F | GLA | 3.5 | 153 | 70  | 54  | n | n | 362 | 2143.8 | 548 | 10   |
| 57 | M | GLA | 4.5 | 144 | 81  | 53  | n | y | 353 | 1571.1 | 602 | 16   |
| 64 | F | GLA | 2   | 131 | 62  | 82  | n | n | 348 | 2189.6 | 554 | 21   |
| 78 | M | GLA | 5   | 130 | 72  | 64  | n | n | 213 | 1801.1 | 600 | 34   |
| 48 | F | GLA | 3.5 | 147 | 98  | 89  | n | n | 296 | 2152.6 | 618 | 23   |
| 84 | M | GLA | 5   | 140 | 76  | 66  | n | n | 397 | 2664.6 | 526 | 13   |
| 79 | F | GLA | 3   | 149 | 70  | 74  | n | n | 267 | 2030.4 | 630 | 12   |
| 90 | M | GLA | 4   | 176 | 95  | 76  | n | n | 326 | 1699.1 | 512 | 72   |
| 74 | M | GLA | 3   | 149 | 81  | 73  | n | y | 246 | 2303.6 | 604 | 30   |
| 61 | F | GLA | 2.5 | 120 | 71  | 76  | n | n | 298 | 1650.7 | 616 | 18   |
| 50 | M | GLA | 5   | 173 | 119 | 79  | n | n | 299 | 1532.9 | 651 | 44   |
| 78 | F | GLA | 3.5 | 151 | 123 | 55  | n | n | 437 | 2426.2 | 636 | 25   |
| 82 | F | GLA | 2.4 | 114 | 55  | 69  | n | n | 423 | 2486.9 | 608 | 58   |
| 80 | M | GLA | 2   | 94  | 46  | 71  | n | y | 295 | 2180.1 | 578 | 18   |
| 67 | M | CT  | 4.5 | 151 | 75  | 69  | n | n | 301 | 2137.1 | 645 | 17   |
| 71 | F | GLA | 3   | 136 | 70  | 88  | y | n | 354 | 2301.0 | 644 | 23   |
| 77 | M | GLA | 6   | 122 | 64  | 72  | n | n | 362 | 2367.4 | 493 | 16   |
| 76 | M | GLA | 15  | 139 | 71  | 75  | y | n | 315 | 2316.4 | 607 | 26   |
| 78 | F | GLA | 3.5 | 139 | 88  | 77  | n | n | 302 | 2142.7 | 615 | 20   |
| 90 | M | GLA | 3.5 | 118 | 88  | 70  | n | y | 350 | 1940.7 | 482 | 21   |
| 75 | F | GLA | 4   | 128 | 89  | 67  | n | n | 402 | 1971.9 | 526 | 40   |
| 90 | M | GLA | 2.5 | 148 | 88  | 90  | n | n | 404 | 2306.8 | 601 | 34   |
| 63 | M | CT  | 4.5 | 132 | 93  | 79  | n | y | 422 | 2160.8 | 652 | 16.3 |
| 86 | F | GLA | 4   | 157 | 88  | 88  | n | n | 281 | 1991.8 | 639 | 23   |
| 63 | M | CT  | 4   | 141 | 94  | 109 | n | y | 314 | 1938.0 | 738 | 14   |
| 74 | F | GLA | 5   | 146 | 73  | 63  | n | n | 387 | 1692.6 | 496 | 18   |
| 80 | M | GLA | 5.5 | 120 | 72  | 70  | n | n | 292 | 1982.0 | 539 | 42   |
| 76 | M | GLA | 6.5 | 144 | 79  | 73  | n | n | 352 | 1342.8 | 538 | 25   |
| 81 | M | GLA | 6   | 133 | 79  | 95  | n | n | 232 | 2296.9 | 463 | 37   |
| 70 | F | GLA | 3   | 114 | 69  | 75  | n | n | 311 | 2066.9 | 528 | 30   |
| 82 | F | GLA | 6.5 | 135 | 83  | 89  | n | n | 281 | 2141.3 | 489 | 21   |
